# Supplementary material for: Ozone and ozone/vacuum-UV degradation of diethyl dithiocarbamate collector: kinetics, mineralization, byproducts and pathways
Source: Royal Society of Chemistry journal article supplement (doi:10.1039/c9ra04127c), 2019-01-01
Supplement: c9ra04127c1.pdf [file c9ra04127c1.pdf]

## Supplementary Information for

### **Ozone and ozone/vacuum-UV degradation of diethyl dithiocarbamate collector:**

#### **Kinetics, mineralization, byproducts and mechanisms**

Pingfeng Fu\*, Yanhong Ma, Huifen Yang, Gen Li, Xiaofeng Lin

*School of Civil and Resources Engineering, University of Science and Technology Beijing, Beijing 100083, China.*

#### **Figure list**

**Figure S1** Molecular structure of sodium diethyl dithiocarbamate

**Figure S2** Distribution of UV irradiation emitted from the Vacuum-UV (VUV) lamp

**Figure S3** Mass spectrums of byproducts generated in the VUV/O<sub>3</sub> degradation of DDC, (a) *N,N*-diethylformamide; (b) *N,N*-dimethylacetamide; (c) *N*-ethylacetamide; (d) *N*-methylacetamide; (e) 5,6-dihydro thymine; (f) *N*-formyl-*N*-methylformamide; (g) diacetamide.

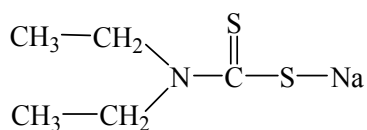

**Fig. S1** Molecular structure of sodium diethyl dithiocarbamate

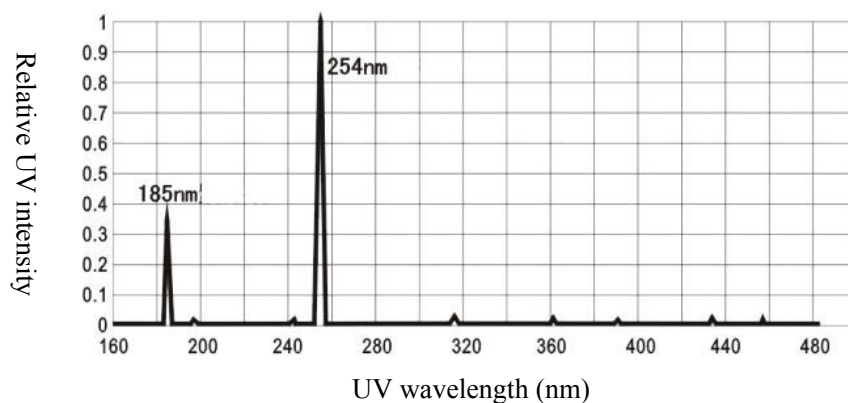

**Fig. S2** Distribution of UV irradiation emitted from the Vacuum-UV (VUV) lamp

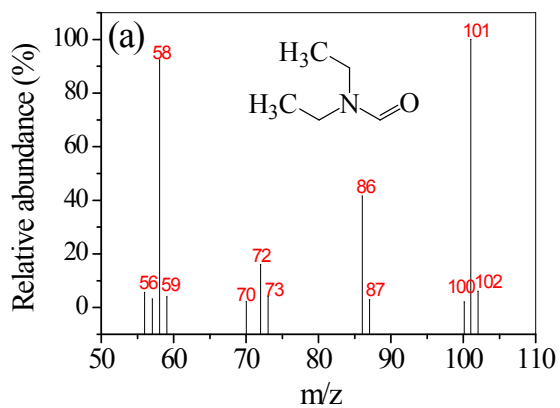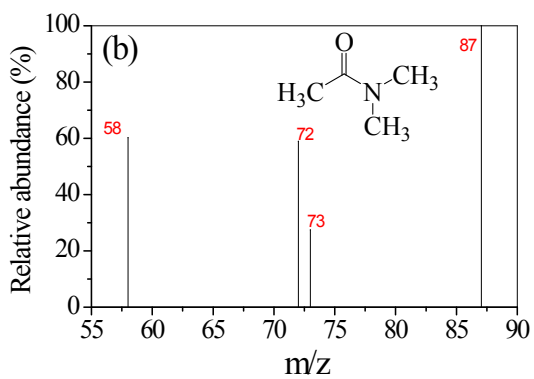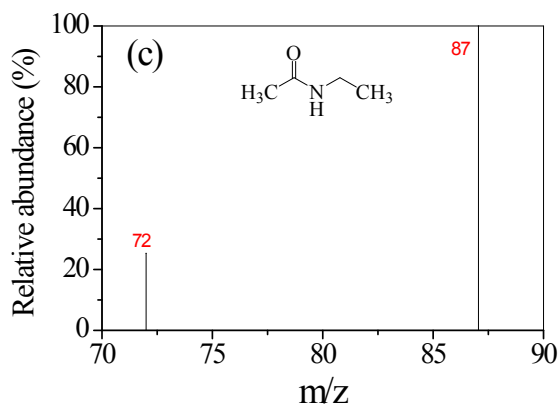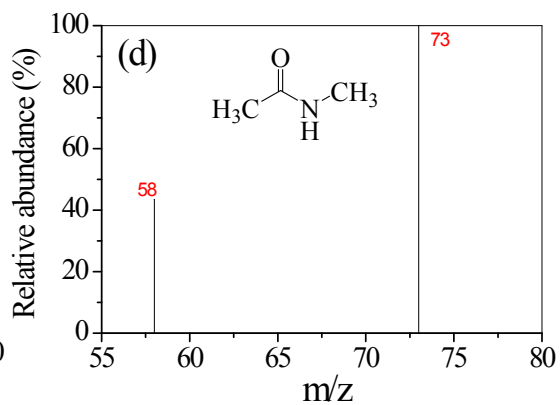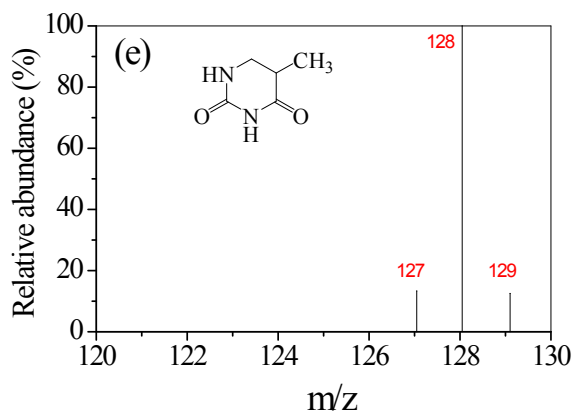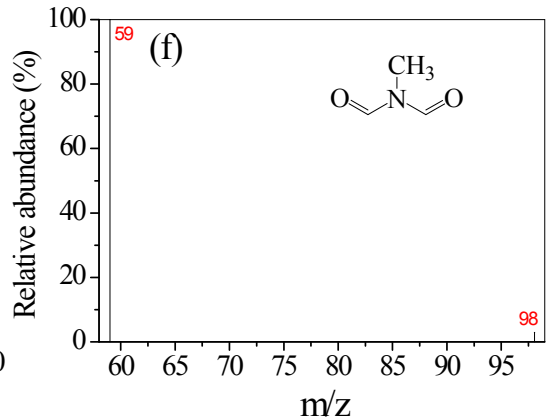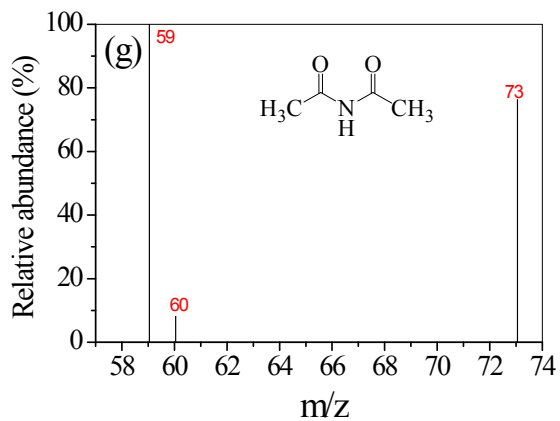

**Fig. S3** Mass spectrums of byproducts generated in the VUV/O<sub>3</sub> degradation of DDC, (a) *N,N*-diethylformamide; (b) *N,N*-dimethylacetamide; (c) *N*-ethylacetamide; (d) *N*-methylacetamide; (e) 5,6-dihydro thymine; (f) *N*-formyl-*N*-methylformamide; (g) diacetamide.
